# Supplementary material for: Baseline NT‐proBNP Accurately Predicts Symptom Response to Transcatheter Aortic Valve Implantation
Source: PubMed Central journal article supplement (PMC7763793; doi:10.1161/jaha.120.017574), 2020-11-26

# **Supplemental Material**

**Table S1. Univariable and multivariable analyses of baseline factors associated with symptomatic non-response to TAVI.**

|                                              | Univariable                    |                    | Multivariable                 |                     |
|----------------------------------------------|--------------------------------|--------------------|-------------------------------|---------------------|
|                                              | OR (95% CI)                    | p-value            | OR (95% CI)                   | p-value             |
| NT-proBNP > 10,000 ng/L                      | <b>113.33 (21.04 – 610.37)</b> | <b>&lt;0.0001*</b> | <b>36.21 (17.51 – 186.04)</b> | <b>&lt;0.0001**</b> |
| NT-proBNP < 800 ng/L                         | <b>29.1 (6.73 – 54.59)</b>     | <b>&lt;0.0001*</b> | <b>16.11 (6.62 – 103.00)</b>  | <b>&lt;0.0001**</b> |
| eGFR < 60 ml/min                             | 1.35 (0.67 – 2.75)             | 0.404              | 0.76 (0.23 – 2.47)            | 0.869               |
| Chronic lung disease                         | <b>2.78 (1.27 – 6.11)</b>      | <b>0.010*</b>      | 1.85 (0.49 – 6.97)            | 0.130               |
| Atrial fibrillation                          | 0.57 (0.24 – 1.35)             | 0.205              | 1.97 (0.32 – 12.1)            | 0.461               |
| Left ventricular ejection fraction < 50%     | 1.00 (0.43 – 2.35)             | 0.500              | 1.21 (0.22 – 6.65)            | 0.826               |
| E/e' > 14                                    | 1.18 (0.59 – 2.37)             | 0.637              | 1.71 (0.16 – 3.11)            | 0.707               |
| ≥ Grade II diastolic dysfunction             | 1.79 (0.87 – 3.68)             | 0.109              | 0.70 (0.15 – 3.30)            | 0.659               |
| ≥ moderate MR                                | <b>3.35 (1.18 – 9.44)</b>      | <b>0.023*</b>      | 0.60 (0.10 – 3.57)            | 0.578               |
| ≥ moderate TR                                | 2.54 (0.96 – 6.76)             | 0.061              | 13.34 (0.58 – 30.51)          | 0.105               |
| Pulmonary artery systolic pressure > 60 mmHg | <b>3.92 (1.09 – 14.16)</b>     | <b>0.037*</b>      | 0.96 (0.02 – 5.23)            | 0.251               |
| RV dysfunction                               | <b>3.86 (1.45 – 10.30)</b>     | <b>0.007*</b>      | 1.71 (0.30 – 12.51)           | 0.082               |

eGFR – estimated glomerular filtration rate; MR – mitral regurgitation; TR – tricuspid regurgitation; RV – right ventricular.

**Figure S1. Symptom status defined by New York Heart Association (NYHA) functional class at baseline and one year after TAVI in: A: Treatment responders and non-responders (defined as  $\Delta$ NYHA $\leq$ 0). B: Treatment responders and non-responders by baseline NT-proBNP category.**

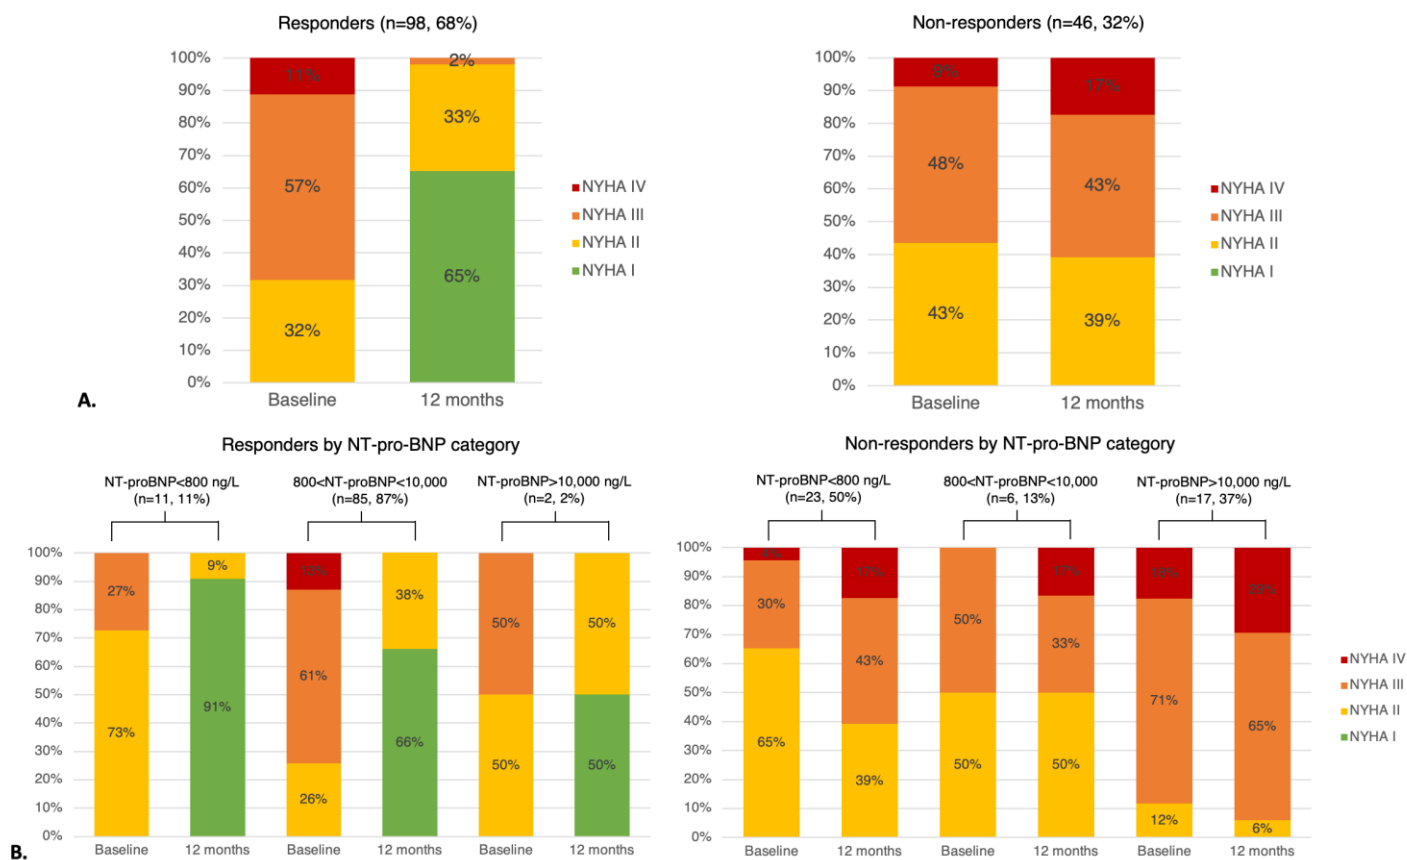

Supplement: JAH3-9-e017574-s001.pdf [file JAH3-9-e017574-s001.pdf]
